# Supplementary material
Source: MDPI journal article supplement (https://www.mdpi.com/2073-4441/8/4/152)
Supplement: s1 [file s1]

# Supplementary Materials: Understanding Persistence to Avoid Underestimation of Collective Food Risk

Francesco Serinaldi and Chris G. Kilsby

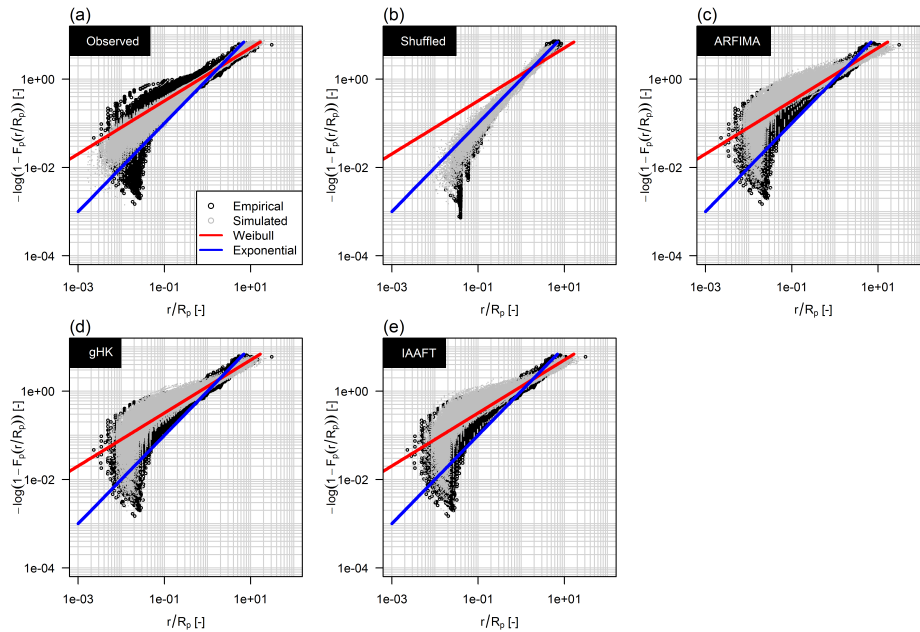

Figure S1. As for Figure 10, but for 98% threshold.

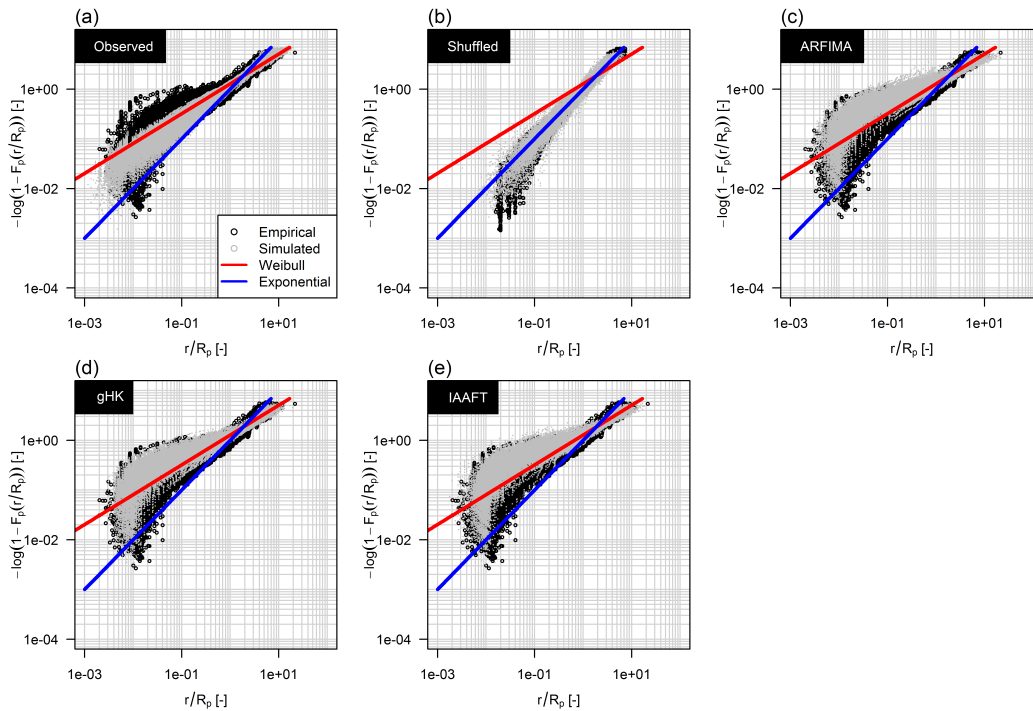

Figure S2. As for Figure 10, but for 99% threshold.

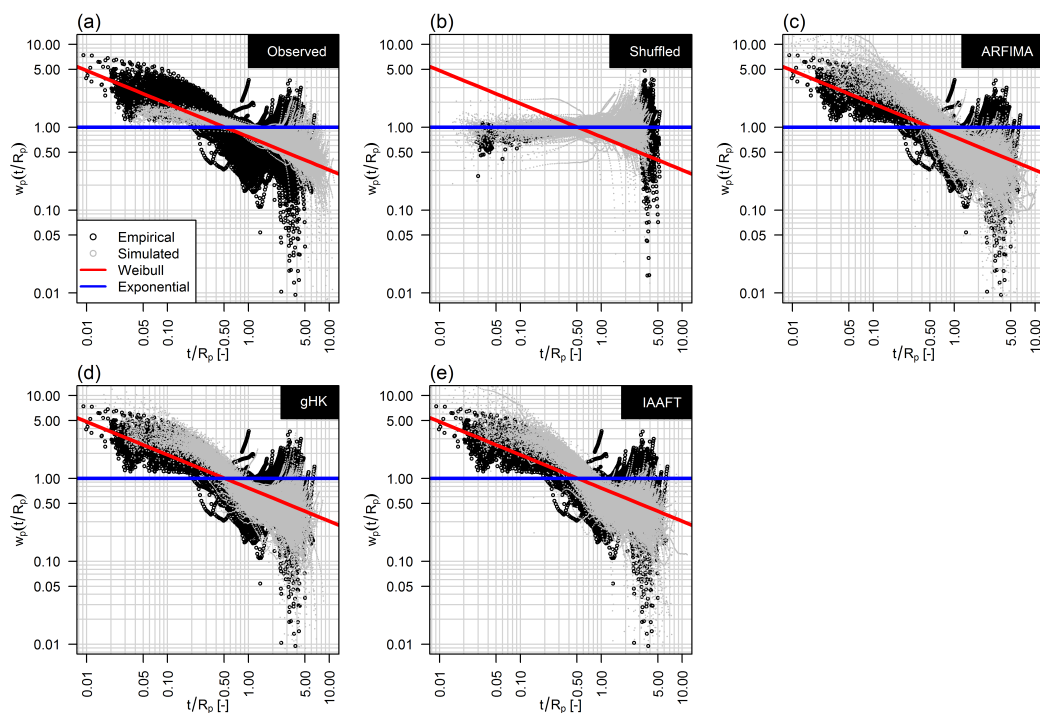

Figure S3. As for Figure 12, but for 98% threshold.

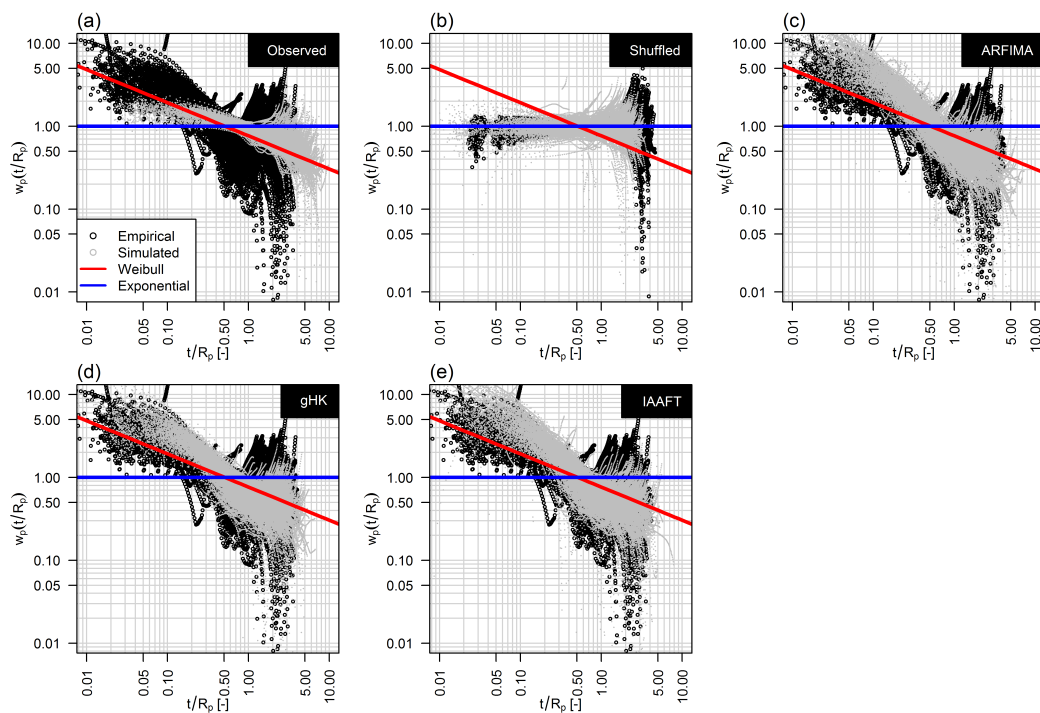

Figure S4. As for Figure 12, but for 99% threshold.

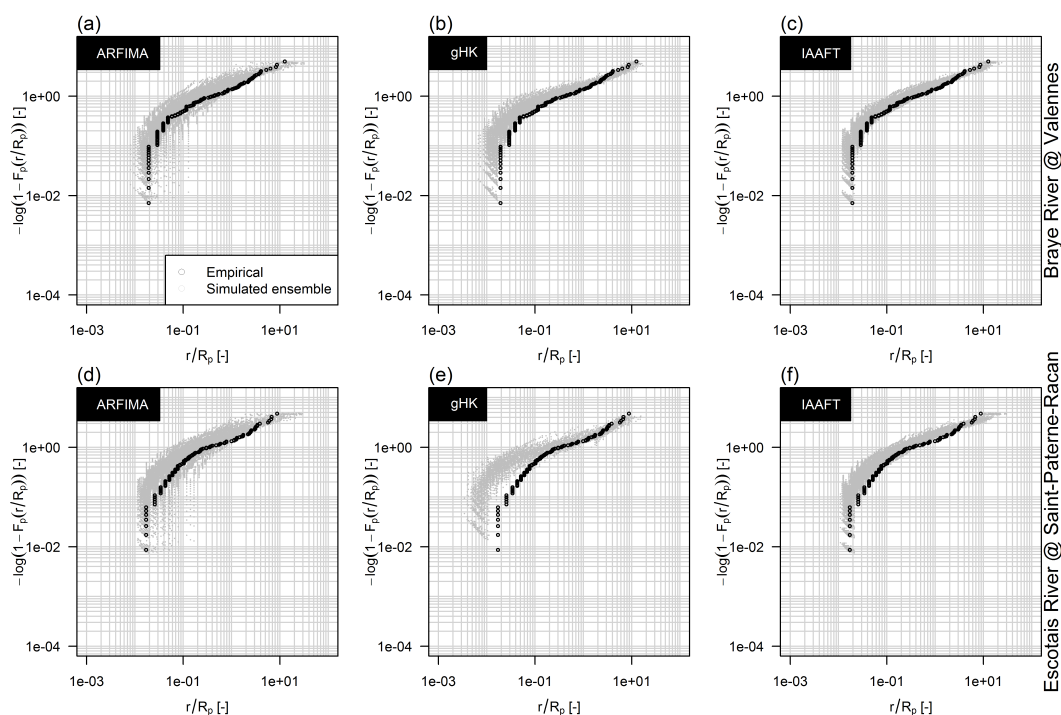

Figure S5. As for Figure 13, but for 98% threshold.

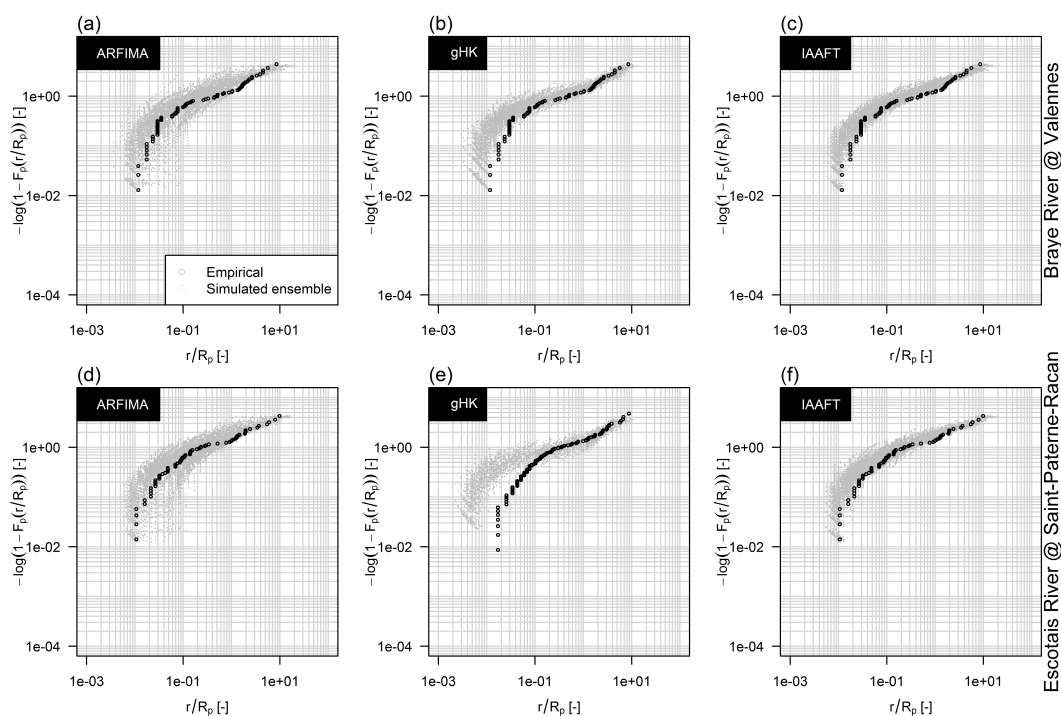

Figure S6. As for Figure 13, but for 99% threshold.

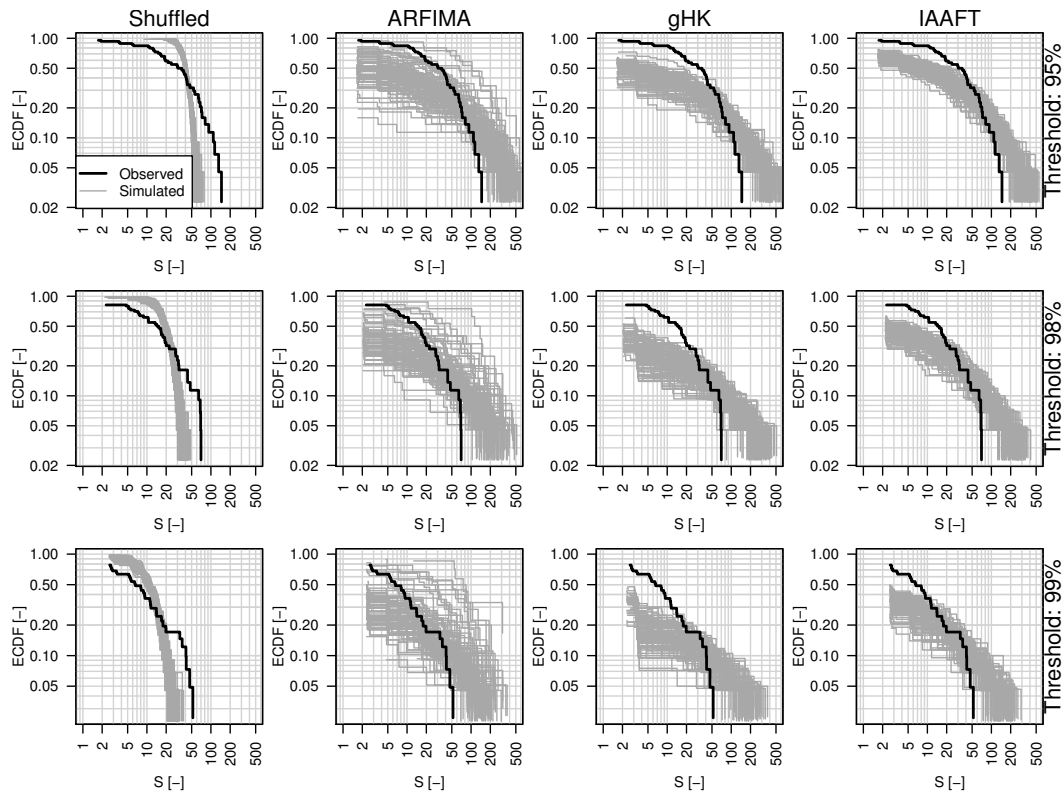

**Figure S7.** As for Figure 16, but for the Bray River.

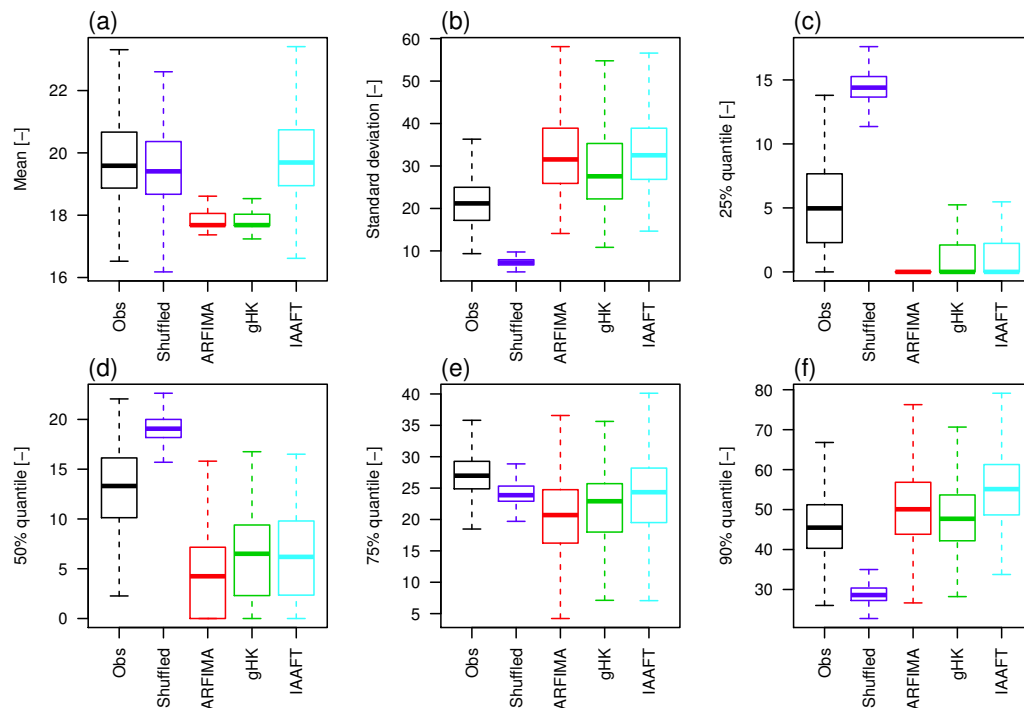

**Figure S8.** As for Figure 17, but for 98% threshold.

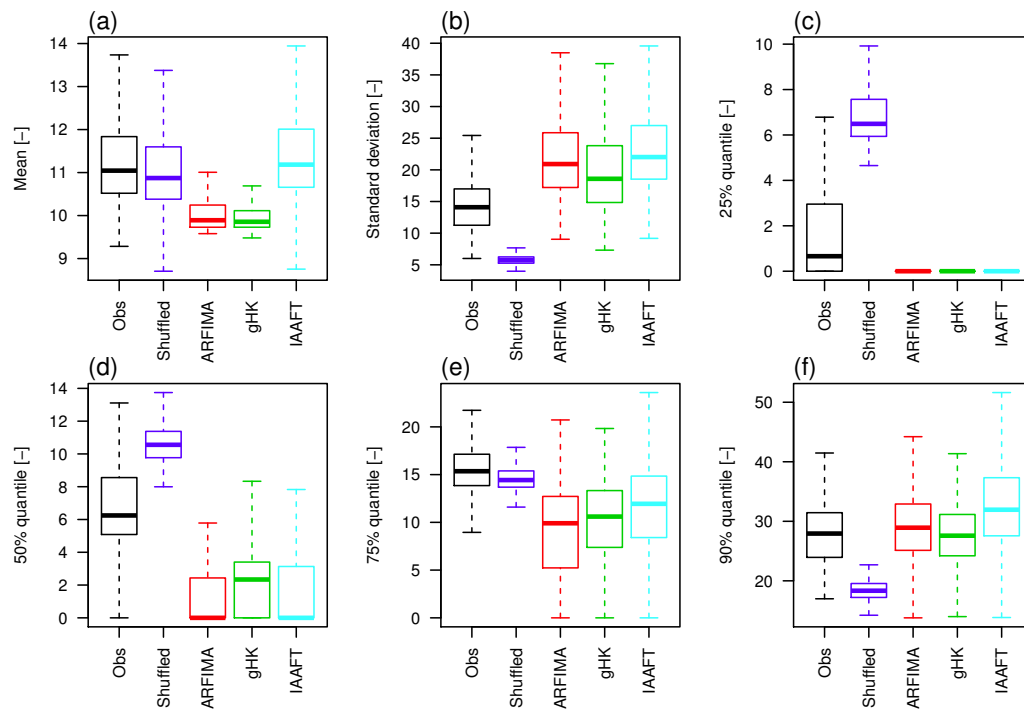

Figure S9. As for Figure 17, but for 99% threshold.

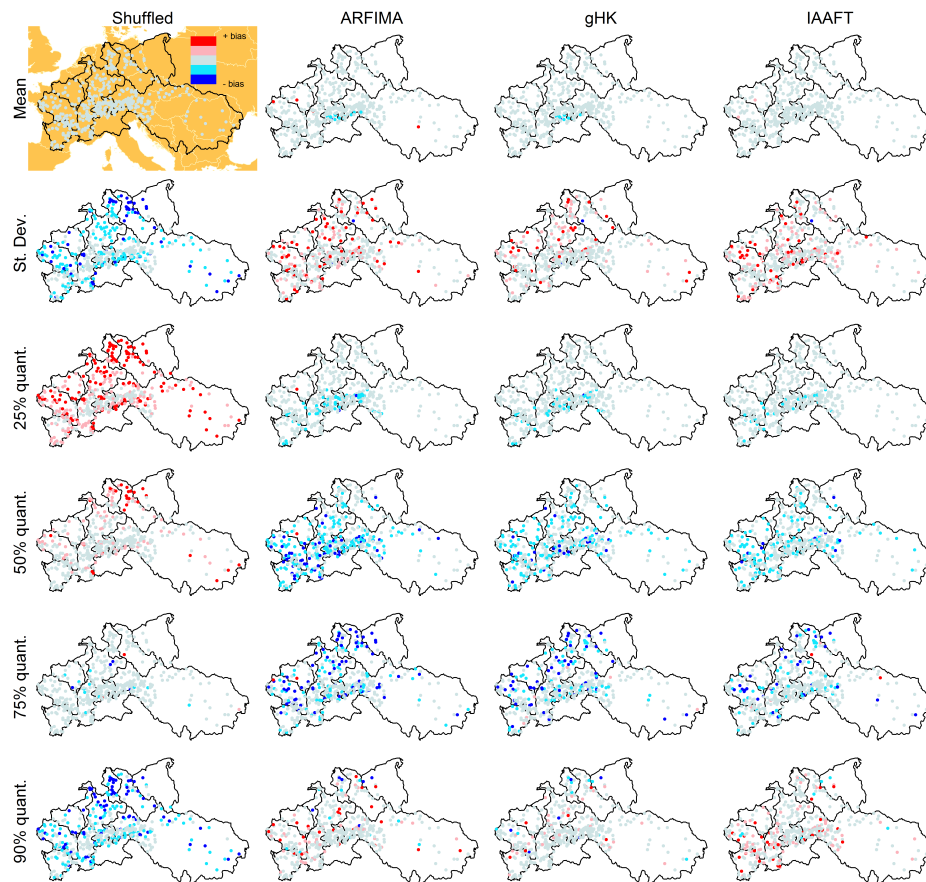

Figure S10. As for Figure 18, but for 98% threshold.

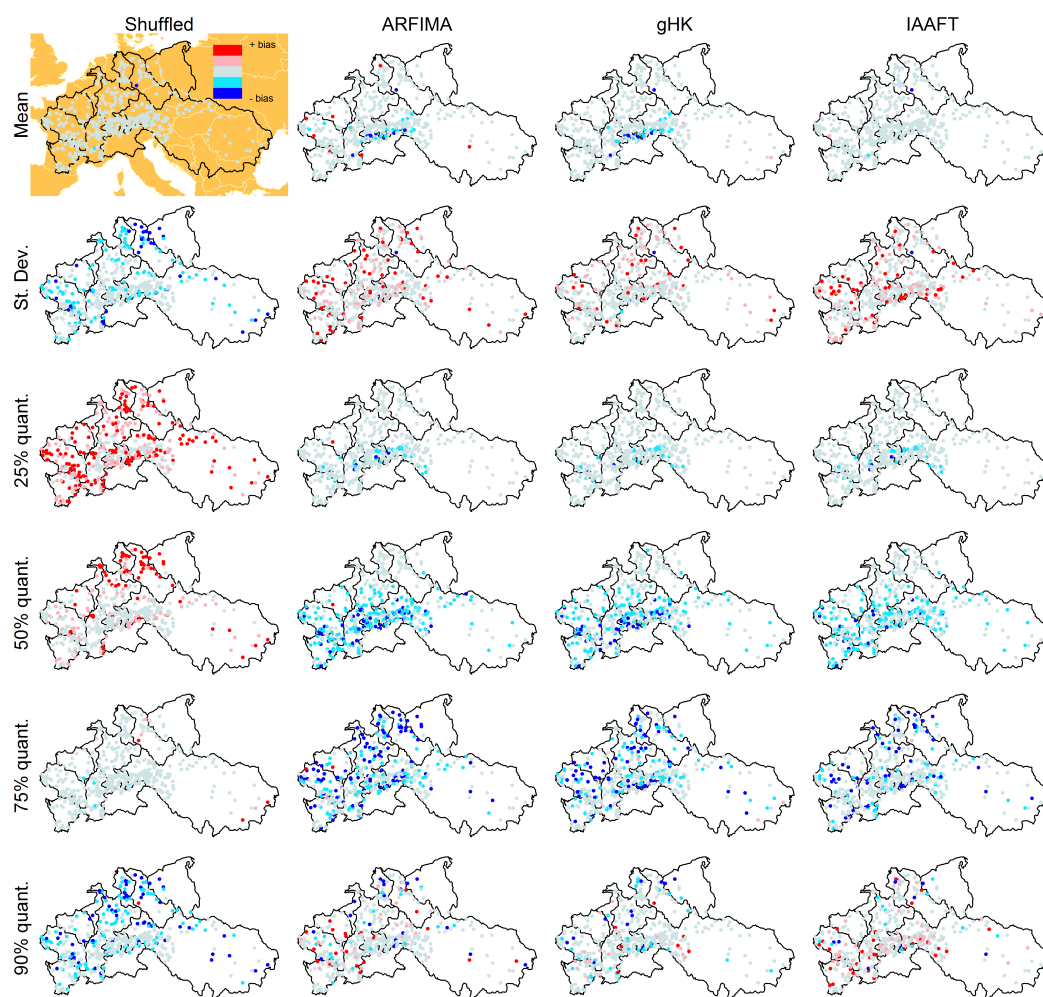

**Figure S11.** As for Figure 18, but for 99% threshold.
